# Supplementary material
Source: publisher figshare collection journal article supplement (https://future-science-group.figshare.com/ndownloader/files/28090416)
Supplement: Supplementary file 1 [file 28090416]

**Supplementary Figure 1. Comparison of miRNA-miRNA correlation hierarchical clustering between MS and control animals.** We used the Dendextend tool in R to compare hierarchical clustering patterns. Similarly, clustered miRNAs between MS and controls are marked by colored connecting lines.

**Supplementary Figure 2. Comparison of miRNA-miRNA correlation hierarchical clustering between MS and control animals in males and females.**  **a)** Tanglegram comparisons for male animals and **b)** females on the right. There were no similarly clustered miRNAs when the data was parsed by sex.
